# Supplementary material for: SNEDDS Containing Poorly Water Soluble Cinnarizine; Development and in Vitro Characterization of Dispersion, Digestion and Solubilization
Source: MDPI journal article supplement (doi:10.3390/pharmaceutics4040641), 2012-12-14
Supplement: s1 [file s1]

## Supplementary Information

**Table S1.** Droplet sizes of dispersed intact SNEDDS and SNEDDS composed of 50% or 100% digested sesame oil in SIM (1%, w/w). Measurements were performed at 37 °C and the results are presented as the hydrodynamic diameter (nm) <sup>a,b</sup>.

| SNEDDS | Media                                | Population 1                  |               | Population 2                  |               | Population 3                  |               | PDI           |
|--------|--------------------------------------|-------------------------------|---------------|-------------------------------|---------------|-------------------------------|---------------|---------------|
|        |                                      | Size (mean ± SD) <sup>c</sup> | % vol (range) | Size (mean ± SD) <sup>c</sup> | % vol (range) | Size (mean ± SD) <sup>c</sup> | % vol (range) | Mean ± SD     |
| I      | Intact in SIM <sub>low</sub>         | 30.0 ± 0.7 (10/10)            | 100           | -                             | -             | -                             | -             | 0.097 ± 0.018 |
|        | 50% digested in SIM <sub>low</sub>   | 18.7 ± 0.6 (10/10)            | 99.4–99.9     | 693 ± 627 (6/10)              | 0.1–0.6       | 4298 ± 703 (7/10)             | 0.1–0.2       | 0.297 ± 0.032 |
|        | 100% digested in SIM <sub>low</sub>  | 27.7 ± 1.4 (10/10)            | 78.0–94.9     | 444 ± 134 (10/10)             | 4.4–8.5       | 3294 ± 1055 (9/10)            | 0.3–17.5      | 0.565 ± 0.023 |
|        | Intact in SIM <sup>high</sup>        | 26.3 ± 1.1 (10/10)            | 100           | -                             | -             | -                             | -             | 0.147 ± 0.016 |
|        | 50% digested in SIM <sup>high</sup>  | 10.8 ± 2.6 (16/16)            | 99.3–100      | 194 ± 259 (13/16)             | 0.2–0.6       | 2905 ± 985 (4/16)             | 0.2–0.6       | 0.385 ± 0.172 |
|        | 100% digested in SIM <sup>high</sup> | 21.9 ± 6.7 (14/14)            | 23.5–100      | 7.9 ± 1.6 (5/14)              | 58.5–80.6     | 3227 ± 1241(11/14)            | 0.1–0.7       | 0.258 ± 0.008 |
| II     | Intact in SIM <sub>low</sub>         | 19.5 ± 0.7 (10/10)            | 99.9–100      | -                             | -             | 4424 ± 159 (3/10)             | 0.1           | 139 ± 0.058   |
|        | 50% digested in SIM <sub>low</sub>   | 18.0 ± 1.7 (10/10)            | 98.7–99.8     | 444 ± 133 (10/10)             | 0.2–1.3       | -                             | -             | 0.349 ± 0.033 |
|        | 100% digested in SIM <sub>low</sub>  | 27.4 ± 0.4 (10/10)            | 74.9–97.5     | 381 ± 64 (10/10)              | 2.5–3.6       | 10.3 (1/10)                   | 22.5          | 0.496 ± 0.018 |
|        | Intact in SIM <sup>high</sup>        | 15.2 ± 0.7 (10/10)            | 100           | -                             | -             | -                             | -             | 0.158 ± 0.006 |
|        | 50% digested in SIM <sup>high</sup>  | 9.5 ± 0.2 (10/10)             | 100           | -                             | -             | 4273 ± 192 (3/10)             | <0.1          | 0.208 ± 0.057 |
|        | 100% digested in SIM <sup>high</sup> | 9.7 ± 1.3 (10/10)             | 79.8–100      | 29.4 ± 1.4 (3/10)             | 15.9–20.1     | 3897 ± 821 (8/10)             | <0.1–0.1      | 0.319 ± 0.047 |
| III    | Intact in SIM <sub>low</sub>         | 13.0 ± 0.3 (13/13)            | 99.9–100      | 243 ± 132 (6/13)              | <0.1–0.1      | 5075 ± 247 (4/13)             | <0.1          | 0.223 ± 0.089 |
|        | 50% digested in SIM <sub>low</sub>   | 12.0 ± 0.5 (13/13)            | 99.8–99.9     | 406 ± 359 (13/13)             | <0.1–0.2      | 4926 ± 339 (4/13)             | <0.1          | 0.362 ± 0.089 |
|        | 100% digested in SIM <sub>low</sub>  | 16.8 ± 3.8 (14/14)            | 38.2–99.6     | 481 ± 175 (14/14)             | 0.2–0.8       | 6.4 (2/14)                    | 46.1–61.5     | 0.406 ± 0.011 |
|        | Intact in SIM <sup>high</sup>        | 10.2 ± 0.3 (10/10)            | 100           | -                             | -             | -                             | -             | 0.140 ± 0.049 |
|        | 50% digested in SIM <sup>high</sup>  | 8.3 ± 0.1 (13/13)             | 100           | -                             | -             | -                             | -             | 0.128 ± 0.054 |
|        | 100% digested in SIM <sup>high</sup> | 7.5 ± 0.2 (16/16)             | 100           | -                             | -             | -                             | -             | 0.152 ± 0.049 |
| IV     | Intact in SIM <sub>low</sub>         | 11.2 ± 0.4 (10/10)            | 100           | -                             | -             | -                             | -             | 0.175 ± 0.040 |
|        | 50% digested in SIM <sub>low</sub>   | 10.8 ± 0.2 (10/10)            | 100           | 243 ± 51.6 (3/10)             | <0.1          | 5217 (2/10)                   | <0.1          | 0.267 ± 0.085 |
|        | 100% digested in SIM <sub>low</sub>  | 10.4 ± 0.6 (10/10)            | 99.9–100      | 188 ± 24.9 (6/10)             | <0.1–0.1      | -                             | -             | 0.346 ± 0.070 |
|        | Intact in SIM <sup>high</sup>        | 8.7 ± 0.3 (10/10)             | 100           | -                             | -             | -                             | -             | 0.168 ± 0.015 |
|        | 50% digested in SIM <sup>high</sup>  | 7.9 ± 0.3 (13/13)             | 100           | -                             | -             | -                             | -             | 0.151 ± 0.059 |
|        | 100% digested in SIM <sup>high</sup> | 7.6 ± 0.2 (13/13)             | 100           | -                             | -             | -                             | -             | 0.178 ± 0.045 |

<sup>a</sup> The droplet sizes of intact SNEDDSs in SIM are also shown in Figure 5. It is included here for comparative purposes; <sup>b</sup> All data from these measurements are included in this table although droplet sizes that was only observed once out of 10 measurements and droplet sizes with a low volume fraction (<1%) may in some cases be considered artefacts; <sup>c</sup> The brackets define the number of times the particular droplet size appears/and the total number of measurements.
